# Supplementary material for: The fungal phytotoxin lasiojasmonate A activates the plant jasmonic acid pathway
Source: PubMed Central journal article supplement (PMC5972634; doi:10.1093/jxb/ery114), 2018-03-24
Supplement: ery114_suppl_supplementary_figures_tables.pdf [file ery114_suppl_supplementary_figures_tables.pdf]

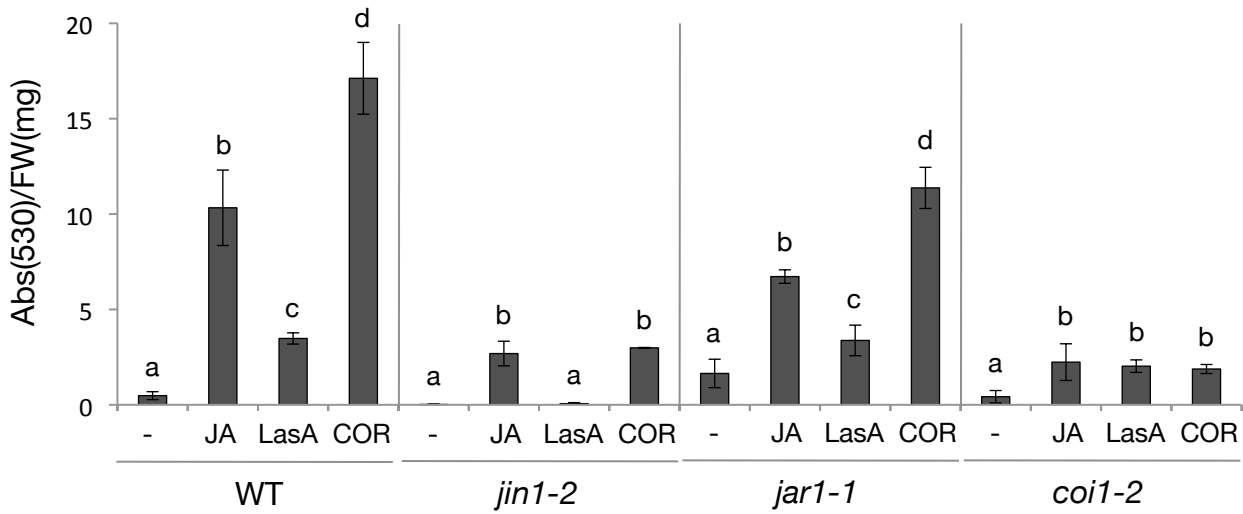

**Supplementary Figure 1.** Accumulation of anthocyanins in response to exogenous treatment with JA, LasA or COR.

Wild-type (Col-0) mutant seedlings (N = 15-25) were germinated in absence (-) or presence of 50  $\mu$ M JA, 50  $\mu$ M LasA or 0.5  $\mu$ M COR. Ten days after germination, anthocyanin accumulation [Abs(530nm)/fresh weight (mg)] was measured. Data show mean  $\pm$  SD. Letters stand for statistical differences (One-way ANOVA with post-hoc Tukey HSD,  $p < 0.05$ ) compared to the untreated control per each plant genotype.

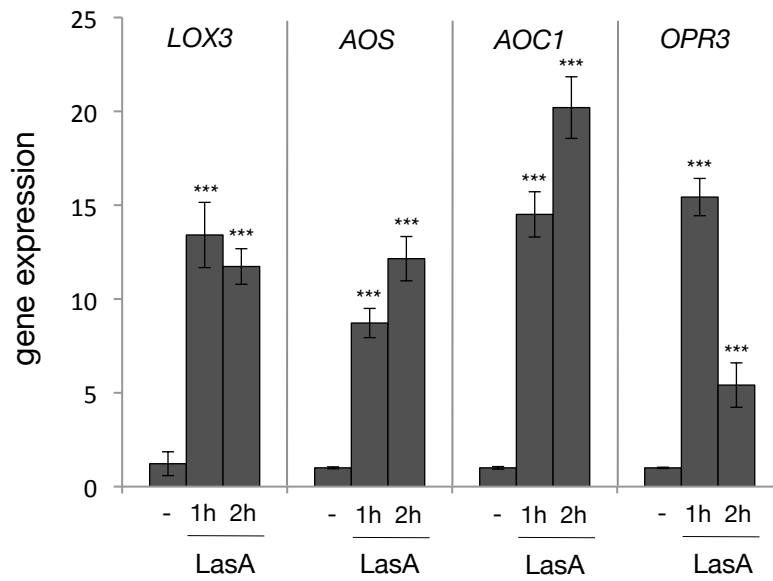

**Supplementary Figure 2.** Effect of LasA on JA-regulated transcriptional activation  
Gene expression analysis of the JA biosynthetic genes *LOX3*, *AOS*, *AOC5* and *OPR3* in wild-type (Col-0) plants in response to 50  $\mu$ M LasA for 1 or 2 hours; untreated plants (-) are included as control. *ACT8* was used as housekeeping control gene. Statistically significant gene expression differences between control and LasA-treated plants are identified with asterisks (Two-tailed Student's t-test; \*\*\*  $P < 0.001$ ). Each biological sample consisted of tissue pooled from 10-15 plants. Data show mean  $\pm$  SD of four technical replicates.

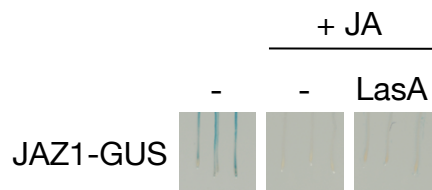

**Supplementary Figure 3.** Effect of LasA on JA-mediated JAZ1 degradation  
GUS visualization of JAZ1-GUS in root tips of 7-day-old transgenic JAZ1-GUS Arabidopsis. 35S:JAZ1-GUS wild-type plants (N = 20) were treated with 5  $\mu$ M JA alone or concurrently with 100  $\mu$ M of LasA for 1h. Untreated control plants are shown as (-).

Supplementary Table 1. Data of root growth measurements reported in Figure 1F.

The fungal phytotoxin lasiojasmonate A activates the plant jasmonic acid pathway

| treatment      | controlJA | LasA  | COR   | controlJA | LasA   | COR    | controlJA | LasA   | COR   | controlJA | LasA  | COR   | controlJA | LasA   | COR    | treatment |        |        |        |        |                |
|----------------|-----------|-------|-------|-----------|--------|--------|-----------|--------|-------|-----------|-------|-------|-----------|--------|--------|-----------|--------|--------|--------|--------|----------------|
| plant genotype | Col-0     | Col-0 | Col-0 | Col-0     | jin1-2 | jin1-2 | jin1-2    | jin1-2 | ja3-1 | ja3-1     | ja3-1 | ja3-1 | jar1-1    | jar1-1 | jar1-1 | jar1-1    | coi1-2 | coi1-2 | coi1-2 | coi1-2 | plant genotype |
| Average        | 33.82     | 6.962 | 6.401 | 6.019     | 33.46  | 19.9   | 17.34     | 18.97  | 33.5  | 20.01     | 15.47 | 15.3  | 33.07     | 19.75  | 24.15  | 6.05      | 33.09  | 25.34  | 25.82  | 22.39  | Average        |
| Standard Dev   | 4.695     | 0.7   | 0.789 | 1.258     | 3.106  | 3.826  | 1.453     | 2.323  | 4.574 | 5.741     | 2.763 | 3.294 | 4.03      | 3.391  | 2.559  | 0.849     | 1.836  | 6.225  | 2.877  | 2.342  | Standard Dev   |
| ANOVA vs CTL   |           | **    | **    | **        |        | **     | **        | **     |       | **        | **    | **    |           | **     | **     | **        |        | **     | **     | **     | ANOVA vs CTL   |
| ANOVA vs JA    | **        |       | ns    | ns        | **     |        | ns        | ns     | **    |           | ns    | ns    | **        |        | ns     | **        | **     |        | ns     | ns     | ANOVA vs JA    |
